# Supplementary material
Source: PubMed Central journal article supplement (PMC2680818)
Supplement: NIHMS57465-supplement-table_II.pdf [file NIHMS57465-supplement-table_II.pdf]

## SUPPLEMENTARY MATERIAL

Supplementary Table II. All novel variants identified in FGF and FGFR CNEs.

| Gene | CNE | Variant | Population   | Case Frequency | Control Frequency | UCSC Genome Browser Position <sup>a</sup> | Base Pair Conservation      |
|------|-----|---------|--------------|----------------|-------------------|-------------------------------------------|-----------------------------|
| FGF2 | 2   | G>C     | Iowa         | 6/167          |                   | Chr 4:124,110,145                         | M, R, D, A                  |
|      | 2   | G>C     | Iowa         | 6/167          |                   | Chr 4:124,110,345                         | M, R, Ra, D, A, E           |
|      | 3   | G>A     | Iowa         | 7/171          | 13/176            | Chr 4:124,119,428                         | M, R, Ra, D, A, E           |
|      | 3   | G>T     | Iowa         | 1/171          | 0/176             | Chr 4:124,119,185                         | M, R, Ra, D, A, E, O, Xt, T |
|      | 4   | G>A     | Iowa         | 1/177          |                   | Chr 4:124,133,532                         | M, R, D, A, E, O            |
|      | 4   | C>A     | Iowa         | 1/177          |                   | Chr 4:124,133,319                         | M, R, D, A, O               |
|      | 5   | C>T     | Iowa         | 8/158          | 2/130             | Chr 4:124,163,470                         | M, R, Ra, D, E, A           |
| FGF3 | 1   | A>G     | Phil         | 15/109         |                   | Chr 11:69,346,124                         | M, R, D                     |
|      | 1   | T>C     | Phil         | 1/109          |                   | Chr 11:69,345,933                         | -                           |
| FGF4 | 2   | C>T     | Phil         | 2/157          |                   | Chr 11:69,296,770                         | M, R, D                     |
| FGF7 | 2   | G>t     | Phil         | 1/140          |                   | Chr 15:47,472,855                         | M, R, Ra, D, A, E, O        |
|      | 2   | A>T     | Phil         | 2/140          |                   | Chr 15:47,473,045                         | M, R, Ra, D, A, E, O        |
|      | 3   | T>C     | Phil         | 19/142         |                   | Chr 15:47,490,373                         | M, R, D, A, O, Xt           |
|      | 3   | G>A     | Phil<br>Iowa | 12/142         |                   | Chr 15:47,490,473                         | M, R, A, O                  |
|      | 3   | G>C     | Phil<br>Iowa | 14/142         |                   | Chr 15:47,490,489                         | M, R, O                     |

|       |    |     |              |        |       |                    |                             |
|-------|----|-----|--------------|--------|-------|--------------------|-----------------------------|
|       | 3  | G>T | Phil         | 10/142 |       | Chr 15:47,490,496  | -                           |
|       | 4  | G>T | Phil         | 2/149  |       | Chr 15:47,502,707  | Ra, D, A, E, O C, Xt        |
| FGF8  | 2  | A>G | Phil         | 1/164  |       | Chr 10:103,523,734 | M, R, Ra, D, O, C, Xt       |
|       | 2  | T>A | Phil         | 1/164  |       | Chr 10:103,523,780 | M, R, Ra, D, O              |
|       | 2  | G>A | Iowa         | 1/164  |       | Chr 10:103,523,419 | M, R, Ra, O, C, Xt          |
| FGF9  | 2  | T>C | Iowa         | 1/166  |       | Chr 13:21,151,510  | M, R, Ra, D                 |
|       | 3  | T>C | Phil         | 1/175  |       | Chr 13:21,174,985  | M, Ra, D, A, E, O, C        |
| FGF10 | 1  | G>A | Phil         | 3/173  | 6/174 | Chr 5:44,427,863   | M, R, Ra, D, E, O, C, Xt    |
|       | 1  | A>G | Iowa         | 1/173  | 0/174 | Chr 5:44,427,841   | M, R, Ra, D, E, O, C, Xt    |
|       | 1  | C>T | Iowa         | 4/173  | 3/174 | Chr 5:44,427,983   | M, R, D, E, O, C, Xt, T     |
|       | 3  | G>C | Iowa         | 1/181  | 4/29  | Chr 5:44,340,627   | M, R, Ra, D, A, E, O, C, Xt |
| FGF18 | 6  | C>T | Iowa         | 1/173  |       | Chr 5:170,798,519  | D, A                        |
|       | 7  | T>C | Iowa         | 1/176  |       | Chr 5:170,807,429  | M, Ra, D                    |
|       | 11 | C>T | Phil<br>Iowa | 2/149  |       | Chr 5:170,822,119  | D, E, O                     |
| FGFR1 | 1  | G>A | Iowa         | 4/177  |       | Chr 8:38,449,139   | M, D, A, E                  |
|       | 1  | G>A | Phil<br>Iowa | 22/177 |       | Chr 8:38,449,012   | M, R, D, A                  |
|       | 1  | C>A | Phil         | 1/177  |       | Chr 8:38,448,960   | M, R, D, E                  |
|       | 5  | G>C | Phil         | 1/173  |       | Chr 8:38,473,234   | M, R, D, E, O               |

|       |    |     |      |       |       |                    |                         |
|-------|----|-----|------|-------|-------|--------------------|-------------------------|
|       | 5  | T>C | Iowa | 5/173 |       | Chr 8:38,473,226   | M, R, D, E              |
|       | 5  | C>A | Phil | 3/173 |       | Chr 8:38,473,376   | D                       |
|       | 6  | A>G | Phil | 2/84  |       | Chr 8:38,449,599   | M, R, D, A, E           |
| FGFR2 | 1  | T>C | Iowa | 5/102 |       | Chr 10:123,458,864 | M, R, Ra, D, A, O       |
|       | 1  | G>A | Phil | 8/102 |       | Chr 10:123,458,555 | M, R, A, E, O, C        |
|       | 3  | G>T | Iowa | 6/151 |       | Chr 10:123,365,553 | D, A, E, O              |
|       | 3  | C>T | Phil | 1/151 |       | Chr 10:123,365,264 | A                       |
|       | 3  | G>A | Phil | 1/151 |       | Chr 10:123,365,233 | D                       |
|       | 5  | C>A | Iowa | 1/145 | 0/154 | Chr 10:123,345,664 | M, R, Ra, D, A, E, O, C |
|       | 8  | G>A | Phil | 1/152 | 0/155 | Chr 10:123,274,030 | M, R, Ra, D, A, E, O, C |
|       | 10 | A>G | Iowa | 2/151 |       | Chr 10:123,229,037 | M, R, Ra, D, A, E       |
| FGFR3 | 1  | A>C | Phil | 1/141 |       | Chr 4:1,777,463    | M, R, A, E              |
|       | 2  | C>T | Iowa | 1/129 |       | Chr 4:1,772,043    | M, R, D, A, E, C        |
|       | 2  | C>T | Iowa | 1/129 |       | Chr 4:1,772,180    | M, R, D, A, O           |
|       | 3  | C>T | Phil | 6/175 |       | Chr 4:1,766,606    | M, R, Ra, D, C          |
|       | 3  | C>T | Iowa | 1/175 |       | Chr 4:1,766,688    | M, R, Ra, D, O          |
|       | 3  | C>T | Iowa | 1/175 |       | Chr 4:1,766,853    | Ra, D                   |
|       | 3  | C>G | Iowa | 3/175 |       | Chr 4:1,767,009    | D                       |
|       | 6  | C>T | Phil | 3/174 |       | Chr 4:1,756,953    | D, E                    |

|               |           |     |      |        |  |                 |         |
|---------------|-----------|-----|------|--------|--|-----------------|---------|
|               | 6         | G>A | Phil | 1/174  |  | Chr 4:1,759,877 | D       |
|               | 6         | G>A | Iowa | 1/174  |  | Chr 4:1,757,337 | D, E    |
|               | 10        | T>C | Iowa | 20/136 |  | Chr 4:1,732,295 | M, R, D |
|               | 10        | A>G | Phil | 3/136  |  | Chr 4:1,732,481 | M, R, D |
|               | 10        | C>T | Iowa | 1/136  |  | Chr 4:1,732,679 | -       |
| <b>Totals</b> | <b>55</b> |     |      |        |  |                 |         |

Those variants highlighted in red are conserved across 8 species.

<sup>a</sup> UCSC Genome Browser Position from the human March 2006 assembly.

M, mouse; R, rat; Ra, rabbit; D, dog; A, armadillo; E, elephant; O, opossum; C, chicken; Xt, X. tropicalis; T, tetradon.
